# Supplementary material for: Increased expression of anion transporter SLC26A9 delays diabetes onset in cystic fibrosis
Source: JCI journal article supplement (doi:10.1172/jci129833), 2019-10-03
Supplement: sd1 [file 1]

## **Supplemental Material and Methods**

### **Regulatory Profile Conservation Analysis of the region encompassing of**

#### ***SLC26A9***

To explore regulatory profile of the region 5' and within intron 1 of *SLC26A9*, we used the Open Regulatory Annotation database (OREGAnno) track on the UCSC genome browser (<https://www.genome.ucsc.edu>), which contains curated regulatory annotation including transcription factor general binding sites derived from experimental data (41). We also evaluated conservation in this region using the Vertebrate Multiz Alignment & Conservation track.

### **Single-cell RNA-sequencing of pancreatic cells**

*Preparation of single cells:* Human pancreatic material not used for islet autotransplantation was immediately dissociated into single cells by enzymatic digestion by incubation with Accumax (Invitrogen). Cell clumps were removed with the MACS SmartStrainer 30 $\mu$ M. Cells were then prepared according to the 10X Genomics® Cell Preparation Guide for Single Cell Protocols and resuspended in PBS with 0.04% BSA. Cell viability (~80%) and concentration were determined using the Cellometer Auto 2000 Cell Viability Counter. The single cell cDNA library was prepared using droplet-based technology from 10X Genomics®. ~17,400 single cells were immediately loaded into the 10X Genomics® Chromium Controller to prepare gel bead-in-emulsions (GEMs). Single cell libraries were generated according to the 10X Genomics Chromium Single-Cell 3' v2 protocol. The library was loaded onto an Illumina NextSeq500 with 2x75 cycle paired end sequencing.

*Processing of RNA-Seq Reads:* Processing of RNA-Seq reads was completed with the Cell Ranger Single Cell Software and pipeline v2.1.1

(<http://software.10xgenomics.com/single-cell/overview/welcome>). Raw base call files were demultiplexed into FASTQ files. Reads were aligned to GRCh38 supplied by 10X Genomics® using STAR. Cell barcodes and unique molecular identifiers (UMIs) were counted and filtered for barcodes corresponding to a known barcode sequence and for unique RNA molecules. Cells were filtered for those with UMI counts >10% of the 99<sup>th</sup> percentile, a cut-off identified by Cell Ranger. The Seurat R package (version 2.3.3) (43) was used for further quality control. Genes expressed in fewer than 3 cells and cells expressing fewer than 200 detected genes were filtered out. Cells with greater than 50% mitochondrial expression and >3000 unique gene counts (possible doublets) were also filtered out.

### **Plasmid construction**

Reporter constructs were generated to contain regions of different lengths (5' 4.8kb, 2.3kb, 1.172kb and 1.173kb) corresponding to either high risk (HR) or low risk (LR) haplotypes (Supplemental Figure 3). Inserts were amplified from genomic DNA using specific primers with KOD Hot Start DNA polymerase. With overhangs added, inserts were fused upstream to the firefly luciferase reporter PGL4.10 vector (Promega) using the In-fusion Cloning Kit (Takara) according to manufacturer's instructions. After transformation in Stellar Competent Cells (provided by the In-fusion Cloning kit), plasmids resulting from both Spinsmart™ Plasmid Miniprep DNA Purification Kit (Denville) and Plasmid Maxi Kit (Qiagen) were checked by sequence analyses. As

needed, site-directed mutagenesis was used to modify key variants or unwanted changes as a result of subcloning to match the sequence corresponding to haplotypes-of-interest with the Site-Directed Mutagenesis Kit (NEB).

### **Variant association with gene expression**

Pancreas and lung cis-eQTL association statistics of the CFRD-associated variants (8) were downloaded from GTEx(v7) (Supplemental Table 4). Directionality of beta value was modified from GTEx. A positive beta value indicates association of the high risk allele instead of the reference allele.

### **Statistics**

The optimized sequence kernel association tests (SKAT-O) were used to check for association between sets of variants and CFRD. Statistical significance after correction for the number of windows used in the analysis was defined as a p-value  $<0.01/36=2.7E-4$ . Determining significance of co-expression of transcripts in scRNA-seq data: The hypergeometric test was used to measure the statistical significance of two genes being co-expressed in the same cell given the total number of cells they are expressed in. Significance of co-expression was only calculated if at least 1 cell expressed both genes. P-values  $<0.05$  were considered significant. See methods for details. Dual luciferase-renilla assay: DLRA reading was performed three times for each of the transfection well. Each of the three readings were averaged. An  $\alpha=0.05$  using a Student's t-test based on a difference between sample means was considered significant.

## **SUPPLEMENTAL MATERIAL APPENDIX:**

**Supplemental Figure 1.** Haplotypes observed in 762 F508del homozygous samples (1,524 chromosomes) across the *SLC26A9* locus

**Supplemental Figure 2.** Violin plot of *CFTR* and *SLC26A9* expression in pancreatic cells

**Supplemental Figure 3.** Dual Luciferase-Renilla Experimental Design

**Supplemental Table 1.** Summary statistics of associations for SNPs that reached genome-wide or suggestive significance in the genome-wide association study for CFRD onset (Blackman *et al.*, 2013)

**Supplemental Table 2.** The number of cells sequenced by predicted cell type

**Supplemental Table 3.** Average normalized gene expression values of selected genes in cells that express only *CFTR*, only *SLC26A9*, both or neither

**Supplemental Table 4.** Top CFRD-associated variants as eQTLs for *SLC26A9*

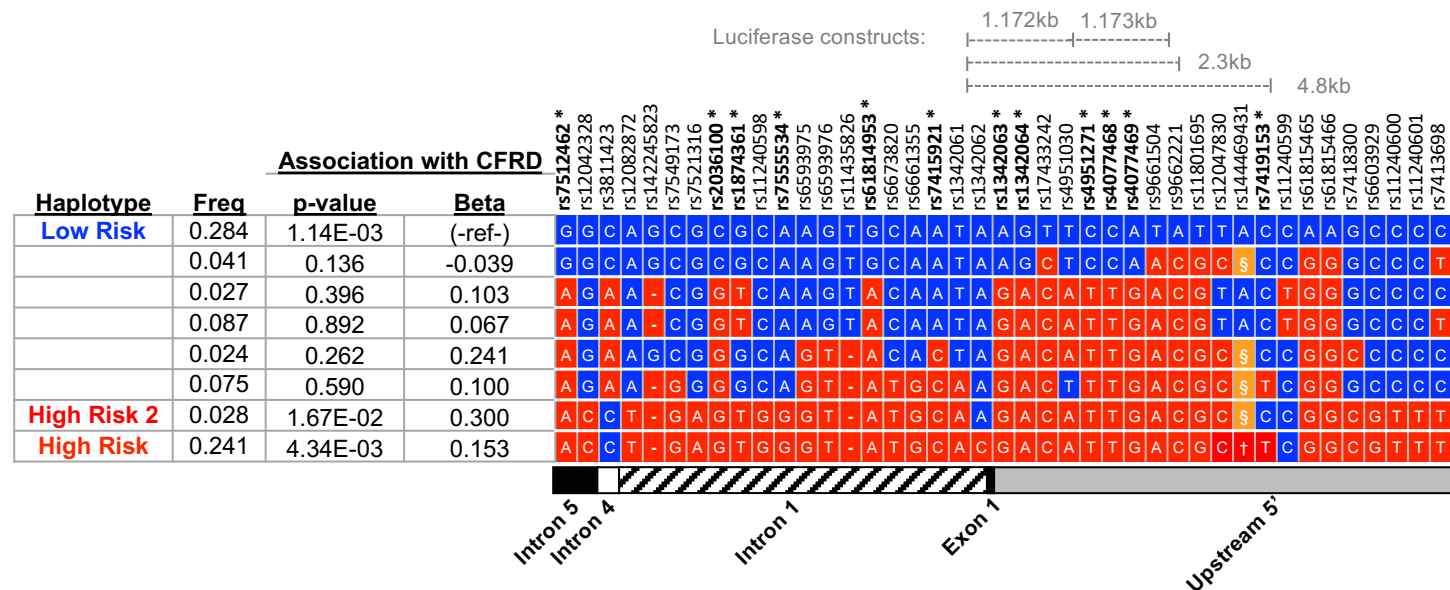

**Supplemental Figure 1. Haplotypes observed in 762 F508del homozygous samples (1,524 chromosomes) across the *SLC26A9* locus.** Representation of *SLC26A9* SNP haplotypes with MAF>15% and MHF>2%. Location of variants relative to *SLC26A9* are shown in box diagram below the haplotypes (Note: *SLC26A9* is on (-) DNA strand thus locations are shown 3' to 5' from left to right, not drawn to scale). Haplotype frequencies, p-values and beta values are shown to the left of the respective haplotype. rsIDs are shown above with the gray dotted lines denoting the SNPs that were included in the respective luciferase constructs. CFRD-associated variants reported by Blackman *et al.* 2013 are marked by an asterisk (\*) and bolded. SNPs highlighted in blue indicate the most common ancestral haplotype. Variants highlighted in red indicate changes from the most common ancestral haplotype. § indicates TGGGGCCTCGGGTACCTCA, and † indicates TGGGGCCTCGGGTATCTCA. In addition to the Low Risk (LR) and High Risk (HR) haplotypes that we functionally test in this study, also labeled here is High Risk 2, which is identical at 11 of 12 CFRD-associated SNPs (exception is rs7419153).

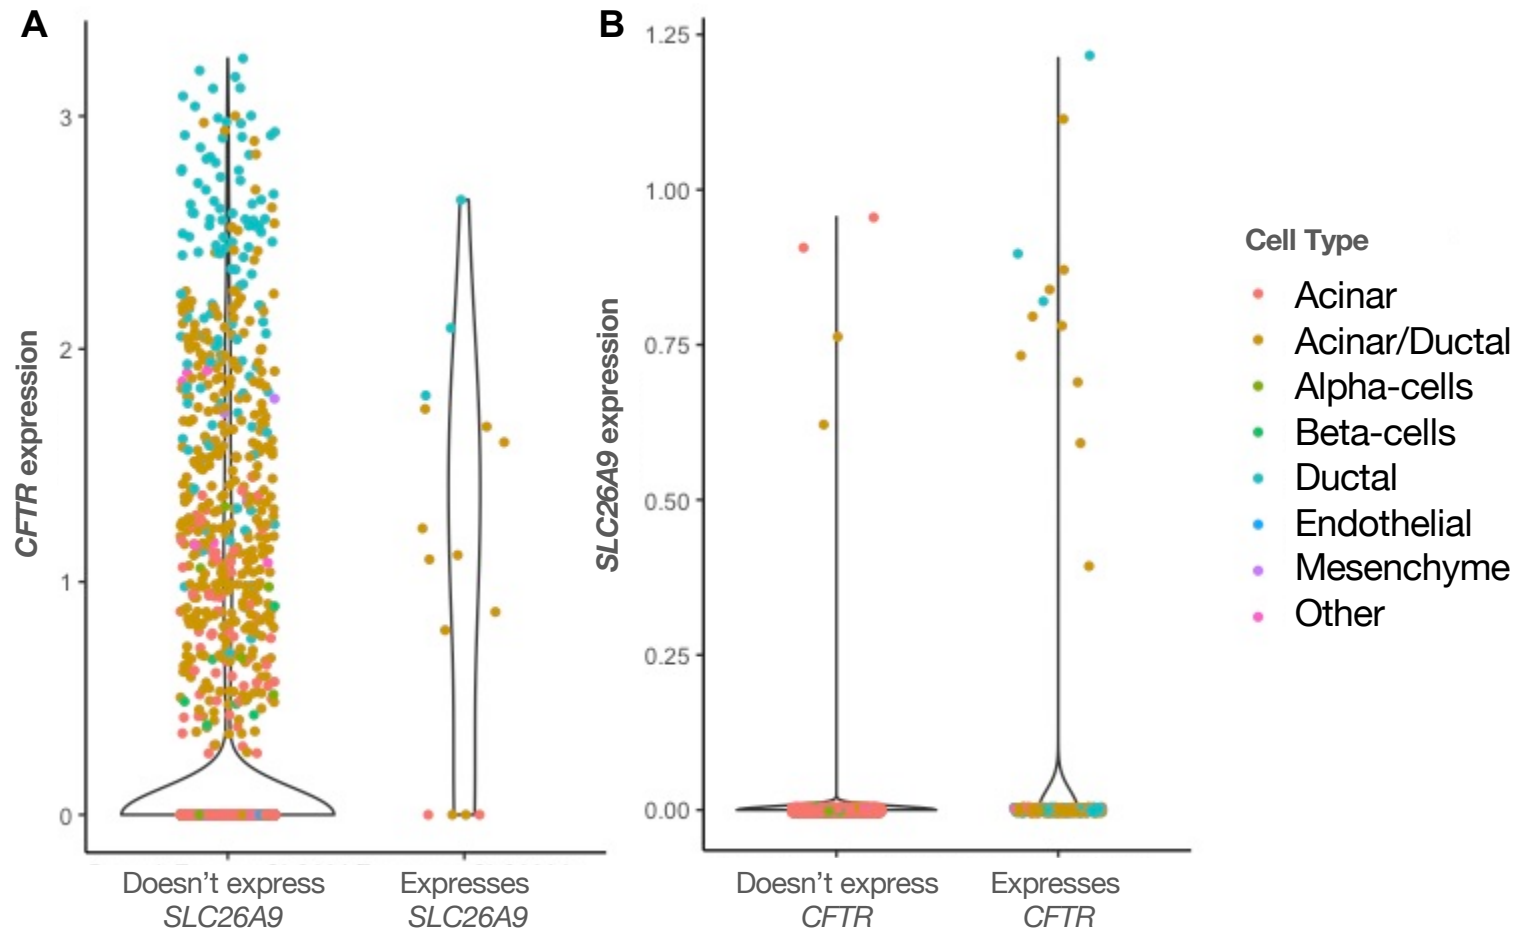

**Supplemental Figure 2. Violin plot of *CFTR* and *SLC26A9* expression in pancreatic cells.** Expression is in log-normalized transcript counts. From our current study, each data point is a cell, colored by the predicted cell type. **(A)** Expression of *CFTR* in cells that do and do not express *SLC26A9*. **(B)** Expression of *SLC26A9* in cells that do and do not express *CFTR*.

### DNA fragment from region 5' of SLC26A9

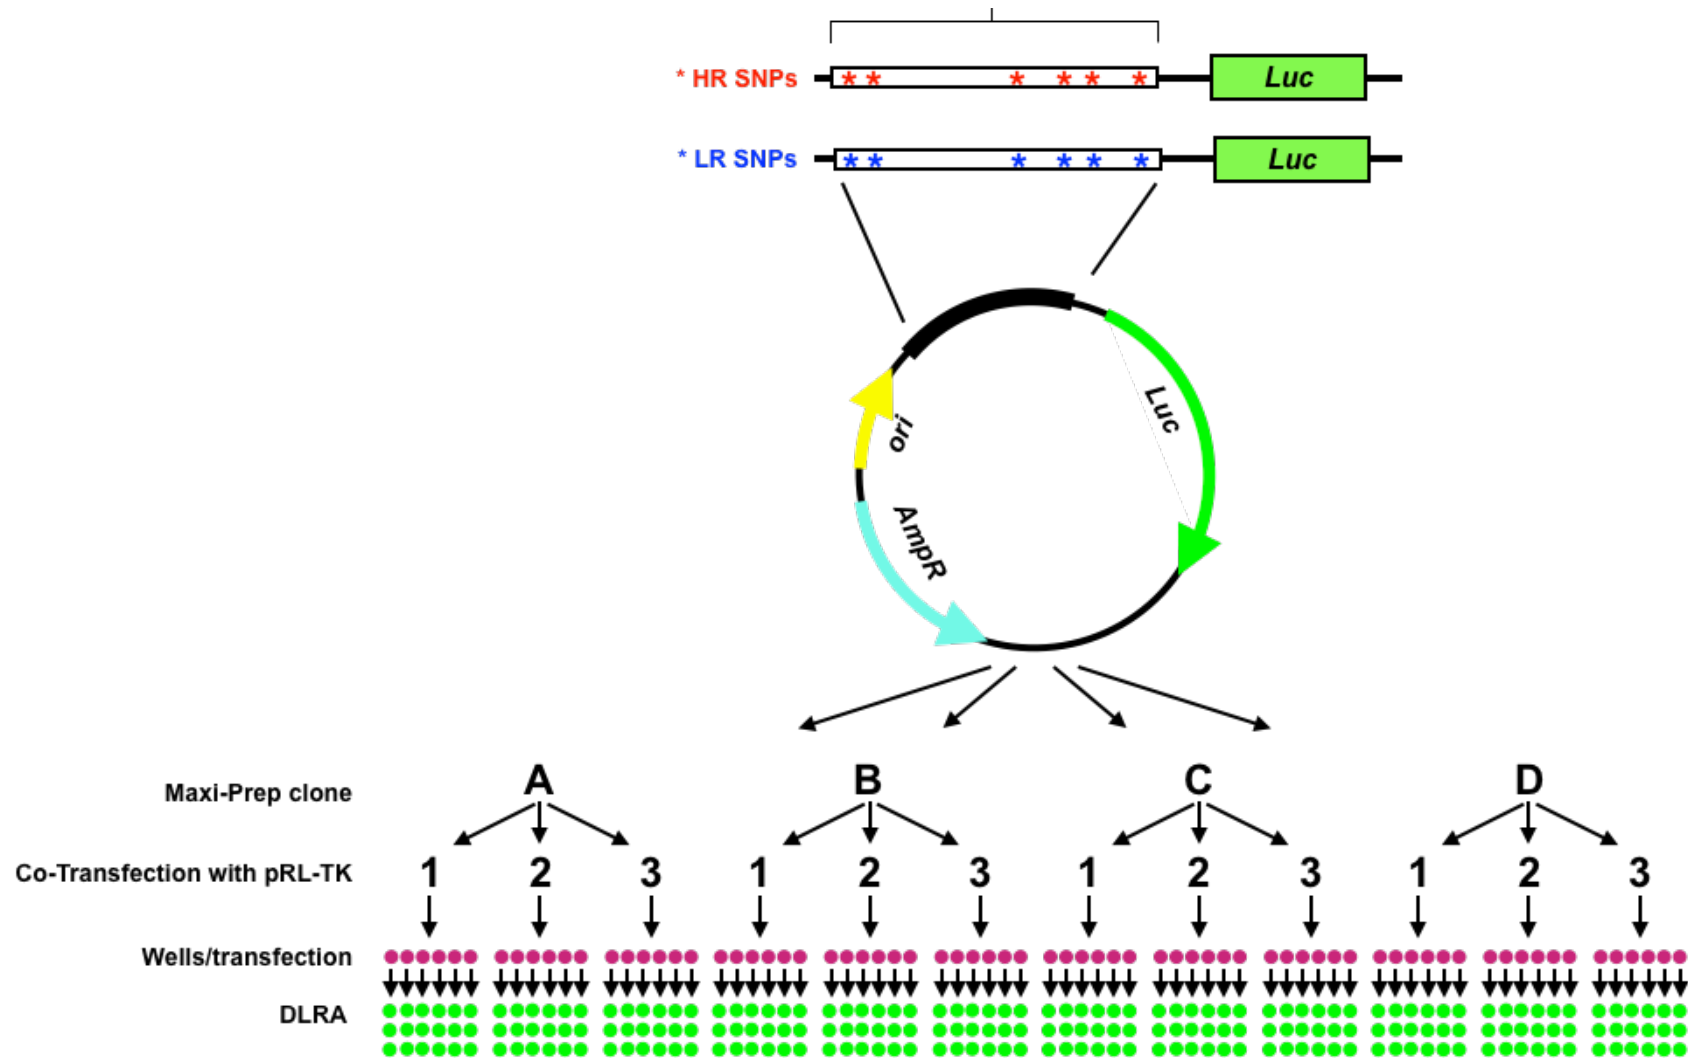

**Supplemental Figure 3. Dual Luciferase-Renilla Experimental Design.** Constructs containing the a DNA fragment from the 5' region of SLC26A9 containing either high risk (HR) or low risk (LR) variants for risk of developing CFRD were cloned in a luciferase reporter plasmid. For each of the DNA fragments tested, clones obtained from two-four maxipreps were prepared and arbitrarily designated as clones A-D. These clones were co-transfected two-three independent times into PANC-1 or CFPAC-1 cells along with the same quantity per well of renilla luciferase encoding plasmid pRL-TK, a control reporter plasmid for the normalization of transfection efficiency. Each transfection consists of 6 wells per transfection. Dual Luciferase-Renilla reading were performed three times for each of the well. Each of the three readings were averaged. Note that the amount of experimental luciferase construct used was calculated based on the concentration of the plasmid adjusted for it size (molecular molar mass). Experimental plasmids and control plasmids are added in a 50:1 ratio.

**Supplemental Table 1. Summary statistics of associations for SNPs that reached genome-wide or suggestive significance in the genome-wide association study for CFRD onset (Blackman *et al.*, 2013).** Association conducted with martingale residuals of Cystic Fibrosis Related Diabetes in 762 508del homozygotes.

| rsID       | bp (hg19) | Location | Ref | Alt | Freq | p-value  | beta  |
|------------|-----------|----------|-----|-----|------|----------|-------|
| rs7512462  | 205899595 | Intron 5 | C   | T   | 0.42 | 1.63E-06 | -0.15 |
| rs2036100  | 205907872 | Intron 1 | G   | C   | 0.41 | 5.65E-06 | -0.14 |
| rs1874361  | 205908186 | Intron 1 | A   | C   | 0.47 | 1.04E-04 | 0.12  |
| rs7555534  | 205908867 | Intron 1 | C   | T   | 0.34 | 1.00E-04 | 0.13  |
| rs61814953 | 205910080 | Intron 1 | C   | T   | 0.39 | 5.39E-05 | -0.13 |
| rs7415921  | 205910883 | Intron 1 | G   | T   | 0.45 | 1.14E-05 | 0.14  |
| rs1342063  | 205912859 | Upstream | T   | C   | 0.42 | 5.92E-05 | -0.13 |
| rs1342064  | 205913073 | Upstream | C   | T   | 0.42 | 6.04E-05 | -0.13 |
| rs4951271  | 205913848 | Upstream | G   | A   | 0.43 | 3.28E-05 | -0.13 |
| rs4077468  | 205914757 | Upstream | G   | A   | 0.42 | 3.83E-05 | -0.13 |
| rs4077469  | 205914885 | Upstream | T   | C   | 0.42 | 3.83E-05 | -0.13 |
| rs7419153  | 205917309 | Upstream | A   | G   | 0.38 | 6.17E-04 | 0.11  |



**Supplemental Table 2. The number of cells sequenced by predicted cell type in our study ('Current Study') and two publicly available datasets (Baron *et al.*, 2016 (GSE84133) ; Segerstolpe *et al.*, 2016 (E-MTAB-5061)). Count and percentage of the cell types in each study is displayed.**

| Current Study |       |         | Baron              |       |         | Segerstolpe                 |       |         |
|---------------|-------|---------|--------------------|-------|---------|-----------------------------|-------|---------|
| Cell Type     | Count | Percent | Cell Type          | Count | Percent | Cell Type                   | Count | Percent |
| Acinar        | 2032  | 67.8    | Beta               | 2525  | 29.5    | Alpha cell                  | 886   | 40.1    |
| Acinar/Ductal | 479   | 16.0    | Alpha              | 2326  | 27.1    | Ductal cell                 | 386   | 17.5    |
| Beta-cells    | 134   | 4.5     | Ductal             | 1077  | 12.6    | Beta cell                   | 270   | 12.2    |
| Ductal        | 133   | 4.4     | Acinar             | 958   | 11.2    | Gamma cell                  | 197   | 8.9     |
| Other         | 75    | 2.5     | Delta              | 601   | 7.0     | Acinar cell                 | 185   | 8.4     |
| Alpha-cells   | 65    | 2.2     | Activated stellate | 284   | 3.3     | Delta cell                  | 114   | 5.2     |
| Mesenchyme    | 45    | 1.5     | Gamma              | 255   | 3.0     | PSC cell                    | 54    | 2.4     |
| Endothelial   | 36    | 1.2     | Endothelial        | 252   | 2.9     | Unclassified endocrine cell | 41    | 1.9     |
| <u>Total</u>  | 2999  |         | Quiescent stellate | 173   | 2.0     | Co-expression cell          | 39    | 1.8     |
|               |       |         | Macrophage         | 55    | 0.6     | Endothelial cell            | 16    | 0.7     |
|               |       |         | Mast               | 25    | 0.3     | Epsilon cell                | 7     | 0.3     |
|               |       |         | Epsilon            | 18    | 0.2     | Mast cell                   | 7     | 0.3     |
|               |       |         | Schwann            | 13    | 0.2     | MHC class II cell           | 5     | 0.2     |
|               |       |         | T_cell             | 7     | 0.1     | Unclassified cell           | 2     | 0.1     |
|               |       |         | <u>Total</u>       | 8569  |         | <u>Total</u>                | 2209  |         |

**Supplemental Table 3. Average normalized gene expression values of selected genes in cells that express only *CFTR*, only *SLC26A9*, both or neither.** List encompasses selected ion channels, bicarbonate transporters, FOXI1 and WNK pathway genes. Gene expression values in our study ('Current Study'), and four previously published studies (Baron *et al.* (GSE84133), Wang *et al.* (GSE83139), Muraro *et al.* (GSE85241) and Segerstolpe *et al.* (E-MTAB-5061)) are shown. Each expression value has been colored according to its relative expression value within each study, where green indicates high expression and grey/white indicates lower expression. NA indicates that this gene was not detected in that study. *SLC26A9* average expression among the five studies are as follows: 'Current Study': 0.0043, 'Baron': 0.0066, 'Wang': 3.9926, 'Muraro': 0.0173 and 'Segerstolpe': 0.7564.

| Ion Channel | Alternative Gene Name | Current Study       |                        |      |                   | Baron               |                        |      |                   | Wang                |                        |         |                   | Muraro              |                        |       |                   | Segerstolpe         |                        |        |                   |
|-------------|-----------------------|---------------------|------------------------|------|-------------------|---------------------|------------------------|------|-------------------|---------------------|------------------------|---------|-------------------|---------------------|------------------------|-------|-------------------|---------------------|------------------------|--------|-------------------|
|             |                       | Expresses CFTR only | Expresses SLC26A9 only | Both | Expresses Neither | Expresses CFTR only | Expresses SLC26A9 only | Both | Expresses Neither | Expresses CFTR only | Expresses SLC26A9 only | Both    | Expresses Neither | Expresses CFTR only | Expresses SLC26A9 only | Both  | Expresses Neither | Expresses CFTR only | Expresses SLC26A9 only | Both   | Expresses Neither |
| ANO1        | CACC, TMEM16A         | 0.00                | 0.00                   | 0.01 | 0.01              | 0.08                | 0.50                   | 0.11 | 0.06              | 25.32               | 0.24                   | 12.36   | 15.04             | 0.30                | 0.00                   | 0.21  | 0.20              | 1.61                | 0.00                   | 4.64   | 1.17              |
| AQP1        |                       | 1.43                | 0.00                   | 0.90 | 0.08              | 2.31                | 0.00                   | 1.44 | 0.04              | 169.18              | 0.16                   | 237.47  | 24.23             | 9.07                | 0.33                   | 27.87 | 0.09              | 270.75              | 0.53                   | 473.63 | 3.80              |
| AQP5        |                       | 0.00                | 0.00                   | 0.00 | 0.00              | 0.04                | 0.17                   | 0.11 | 0.00              | 0.18                | 0.16                   | 0.17    | 0.18              | 0.00                | 0.00                   | 0.00  | 0.00              | 0.73                | 0.00                   | 2.91   | 0.21              |
| ATP6V0D2    |                       | NA                  | NA                     | NA   | NA                | 0.00                | 0.00                   | 0.00 | 0.00              | 0.59                | 0.16                   | 0.17    | 0.41              | 0.01                | 0.17                   | 0.07  | 0.03              | 0.008               | 0.000                  | 0.000  | 0.296             |
| ATP6V1B1    |                       | 0.00                | 0.00                   | 0.00 | 0.00              | 0.00                | 0.00                   | 0.11 | 0.00              | 0.84                | 0.16                   | 0.17    | 0.58              | 0.07                | 0.00                   | 0.04  | 0.02              | 0.49                | 0.29                   | 0.25   | 0.15              |
| ATP6V1C2    |                       | NA                  | NA                     | NA   | NA                | 0.00                | 0.00                   | 0.00 | 0.00              | 422.48              | 670.54                 | 309.71  | 337.51            | 0.00                | 0.00                   | 0.00  | 0.01              | 0.30                | 0.28                   | 0.31   | 0.18              |
| FOXI1       |                       | 0.00                | 0.00                   | 0.00 | 0.00              | 0.00                | 0.00                   | 0.00 | 0.00              | 0.17                | 0.16                   | 0.17    | 0.18              | 0.00                | 0.00                   | 0.00  | 0.00              | 0.00                | 0.00                   | 0.00   | 0.01              |
| OSR1        |                       | 0.00                | 0.00                   | 0.00 | 0.00              | 0.00                | 0.00                   | 0.00 | 0.00              | 0.40                | 0.16                   | 0.17    | 0.18              | 0.00                | 0.00                   | 0.00  | 0.00              | 0.20                | 0.00                   | 0.00   | 0.19              |
| SCNN1A      | ENaCA                 | 0.26                | 0.00                   | 0.17 | 0.01              | 0.11                | 0.00                   | 0.11 | 0.01              | 44.84               | 63.75                  | 126.91  | 12.15             | 2.26                | 0.00                   | 3.47  | 0.07              | 49.16               | 15.97                  | 61.13  | 1.60              |
| SCNN1B      | ENaCB                 | 0.00                | 0.00                   | 0.00 | 0.00              | 0.00                | 0.00                   | 0.00 | 0.00              | 0.63                | 0.16                   | 1.13    | 0.18              | 0.00                | 0.00                   | 0.00  | 0.00              | 0.11                | 0.00                   | 0.00   | 0.03              |
| SCNN1D      | ENaCD                 | 0.00                | 0.00                   | 0.00 | 0.00              | 0.02                | 0.00                   | 0.00 | 0.01              | 0.51                | 0.16                   | 0.17    | 0.38              | 0.04                | 0.17                   | 0.04  | 0.02              | 1.00                | 0.00                   | 0.76   | 1.26              |
| SCNN1G      | ENaCG                 | 0.00                | 0.00                   | 0.01 | 0.00              | 0.01                | 0.00                   | 0.00 | 0.00              | 2.39                | 0.16                   | 0.17    | 0.19              | 0.06                | 0.00                   | 0.25  | 0.00              | 3.06                | 0.00                   | 6.39   | 0.00              |
| SLC26A3     |                       | NA                  | NA                     | NA   | NA                | 0.00                | 0.00                   | 0.00 | 0.00              | 2.51                | 0.16                   | 0.17    | 5.46              | 0.00                | 0.00                   | 0.00  | 0.00              | 0.23                | 0.00                   | 0.00   | 0.01              |
| SLC26A4     | PENDRIN               | 0.10                | 0.00                   | 0.00 | 0.00              | 0.00                | 0.00                   | 0.00 | 0.01              | 6.37                | 0.16                   | 13.93   | 0.84              | 0.26                | 0.00                   | 0.36  | 0.14              | 0.20                | 0.00                   | 0.06   | 0.68              |
| SLC26A6     |                       | 0.00                | 0.00                   | 0.01 | 0.01              | 0.05                | 0.17                   | 0.22 | 0.03              | 19.69               | 0.16                   | 4.22    | 17.03             | 0.15                | 0.00                   | 0.14  | 0.09              | 5.86                | 12.08                  | 7.19   | 4.56              |
| SLC4A2      | AE2                   | 0.23                | 0.00                   | 0.10 | 0.04              | 0.43                | 0.33                   | 0.33 | 0.24              | 40.28               | 53.21                  | 8.06    | 35.23             | 0.61                | 0.33                   | 0.50  | 0.26              | 28.93               | 46.42                  | 44.92  | 16.53             |
| SLC4A4      | NBCe1-B               | 2.51                | 0.56                   | 1.94 | 0.13              | 2.89                | 0.83                   | 2.33 | 0.12              | 760.69              | 24.95                  | 2140.25 | 51.50             | 11.24               | 2.87                   | 24.44 | 0.41              | 119.11              | 14.96                  | 162.55 | 4.72              |
| SLC4A7      | NBCn1                 | 0.08                | 0.00                   | 0.01 | 0.02              | 0.10                | 0.50                   | 0.44 | 0.11              | 155.67              | 116.36                 | 34.66   | 118.66            | 1.93                | 0.67                   | 1.66  | 0.82              | 6.03                | 1.14                   | 8.51   | 4.22              |
| SLC9A1      | NHE1                  | 0.00                | 0.00                   | 0.05 | 0.01              | 0.24                | 0.50                   | 0.11 | 0.11              | 11.08               | 26.94                  | 3.13    | 11.12             | 0.86                | 0.67                   | 1.47  | 0.29              | 7.50                | 16.72                  | 14.22  | 3.51              |
| SLC9A3      | NHE3                  | NA                  | NA                     | NA   | NA                | 0.00                | 0.00                   | 0.00 | 0.00              | 0.35                | 0.16                   | 0.25    | 0.40              | NA                  | NA                     | NA    | NA                | 0.41                | 0.28                   | 0.34   | 0.42              |
| STK39       |                       | 0.00                | 0.00                   | 0.05 | 0.03              | 0.19                | 0.33                   | 0.33 | 0.12              | 65.22               | 557.72                 | 10.78   | 69.82             | 1.83                | 2.87                   | 2.52  | 0.65              | 6.60                | 8.20                   | 6.76   | 3.28              |
| STK39       | SPAK                  | 0.00                | 0.00                   | 0.05 | 0.03              | 0.11                | 0.17                   | 0.33 | 0.13              | 65.22               | 557.72                 | 10.78   | 69.82             | 1.835               | 2.870                  | 2.522 | 0.655             | 6.60                | 8.20                   | 6.76   | 3.28              |
| WNK1        |                       | 0.61                | 0.00                   | 0.11 | 0.05              | 0.50                | 0.00                   | 0.89 | 0.42              | 429.15              | 597.75                 | 254.59  | 340.66            | 5.29                | 6.85                   | 5.69  | 2.86              | 18.81               | 32.62                  | 28.16  | 19.93             |
| WNK4        |                       | 0.00                | 0.00                   | 0.00 | 0.00              | 0.01                | 0.00                   | 0.00 | 0.01              | 3.23                | 0.16                   | 0.21    | 8.63              | 0.110               | 0.167                  | 0.000 | 0.098             | 1.23                | 0.73                   | 0.00   | 3.50              |

**Supplemental Table 4. Top CFRD-associated variants as eQTLs for *SLC26A9*.** Top CFRD-associated SNPs (as determined by Blackman *et al.*, 2013) and their association with *SLC26A9* expression in the pancreas and lung, obtained from GTEx, v7. A positive beta value indicates the risk variants associated with higher gene expression.

|                                                    |                 | Pancreas |          | Lung      |         |
|----------------------------------------------------|-----------------|----------|----------|-----------|---------|
| rsID                                               | Risk/Alt Allele | $\beta$  | p value  | $\beta$   | p-value |
| rs7419153                                          | T/C             | -0.285   | 1.44E-04 | 0.041     | 0.175   |
| rs4077469                                          | G/A             | -0.220   | 3.13E-03 | 0.003     | 0.910   |
| rs4077468                                          | T/C             | -0.220   | 3.13E-03 | 0.003     | 0.910   |
| rs4951271                                          | T/C             | -0.208   | 4.79E-03 | -0.004    | 0.886   |
| rs1342064                                          | A/G             | -0.223   | 2.88E-03 | -0.001    | 0.973   |
| rs1342063                                          | G/A             | -0.224   | 2.80E-03 | -0.001    | 0.978   |
| rs7415921                                          | C/A             | -0.166   | 2.10E-02 | 0.015     | 0.603   |
| rs61814953                                         | A/G             | -0.247   | 1.06E-03 | 0.010     | 0.734   |
| rs7555534                                          | G/A             | -0.093   | 2.26E-01 | 0.054     | 0.061   |
| rs1874361                                          | T/G             | -0.156   | 2.47E-02 | 0.048     | 0.072   |
| rs2036100                                          | G/C             | -0.263   | 3.65E-04 | 0.016     | 0.573   |
| rs7512462                                          | A/G             | -0.246   | 6.26E-04 | 0.006     | 0.839   |
| Overall effect of risk alleles on gene expression: |                 | Decrease |          | No effect |         |
